# Supplementary material
Source: publisher site journal article supplement (https://static.cambridge.org/content/id/urn:cambridge.org:id:article:S1751731120001202/resource/name/S1751731120001202supp001.docx)
Supplement: Supplementary file 1 [file S1751731120001202supp001.docx]

**Genetic growth potential characterization in the Japanese quail: a meta-analysis**

L.C. Carvalho, H.S. Nogueira, A.R.T. Minussi, M.B. Lima, D.P. Munari, N.J. Peruzzi and E.P. Silva

***Animal* Journal**

**Supplementary material S1**

**Supplementary Table S1** *Information on studies used in the research with year of publication, number of animals used (n), age and body weight (BW) of Japanese quails.*

| Study | Authors | Year | n | Age | BW |
| --- | --- | --- | --- | --- | --- |
| S1 | Lobato, 2016 | 2016 | 960 | 1 | 7.5 |
| S1 | Lobato, 2016 | 2016 | 960 | 5 | 18.6 |
| S1 | Lobato, 2016 | 2016 | 960 | 10 | 34.1 |
| S1 | Lobato, 2016 | 2016 | 960 | 15 | 52.8 |
| S1 | Lobato, 2016 | 2016 | 960 | 20 | 80.7 |
| S1 | Lobato, 2016 | 2016 | 960 | 25 | 93.8 |
| S1 | Lobato, 2016 | 2016 | 960 | 30 | 110.1 |
| S1 | Lobato, 2016 | 2016 | 960 | 35 | 122.7 |
| S1 | Lobato, 2016 | 2016 | 960 | 40 | 127.7 |
| S1 | Lobato, 2016 | 2016 | 960 | 45 | 132.3 |
| S2 | Grieser *et al*., 2012 | 2012 | 50 | 1 | 7.2 |
| S2 | Grieser *et a*l., 2012 | 2012 | 50 | 7 | 19.7 |
| S2 | Grieser *et al*., 2012 | 2012 | 50 | 14 | 41.8 |
| S2 | Grieser *et al*., 2012 | 2012 | 50 | 21 | 71.1 |
| S2 | Grieser *et al*., 2012 | 2012 | 50 | 28 | 96.4 |
| S2 | Grieser *et al*., 2012 | 2012 | 50 | 35 | 114.4 |
| S2 | Grieser *et al*., 2012 | 2012 | 50 | 42 | 128.3 |
| S3 | Grieser *et al*., 2012 | 2012 | 50 | 1 | 7.4 |
| S3 | Grieser *et al*., 2012 | 2012 | 50 | 7 | 19.6 |
| S3 | Grieser *et al*., 2012 | 2012 | 50 | 14 | 43.4 |
| S3 | Grieser *et al*., 2012 | 2012 | 50 | 21 | 74.8 |
| S3 | Grieser *et al*., 2012 | 2012 | 50 | 28 | 104.7 |
| S3 | Grieser *et al*., 2012 | 2012 | 50 | 35 | 124.2 |
| S3 | Grieser *et al*., 2012 | 2012 | 50 | 42 | 139.5 |
| S4 | Raji; Alade and Duwa, 2014 | 2014 | 67 | 1 | 6.2 |
| S4 | Raji; Alade and Duwa, 2014 | 2014 | 67 | 7 | 16.5 |
| S4 | Raji; Alade and Duwa, 2014 | 2014 | 67 | 14 | 50.5 |
| S4 | Raji; Alade and Duwa, 2014 | 2014 | 67 | 21 | 76.9 |
| S4 | Raji; Alade and Duwa, 2014 | 2014 | 67 | 28 | 84.4 |
| S4 | Raji; Alade and Duwa, 2014 | 2014 | 67 | 35 | 97.2 |
| S4 | Raji; Alade and Duwa, 2014 | 2014 | 67 | 42 | 109.6 |
| S4 | Raji; Alade and Duwa, 2014 | 2014 | 67 | 49 | 127.4 |
| S4 | Raji; Alade and Duwa, 2014 | 2014 | 67 | 56 | 141.6 |
| S4 | Raji; Alade and Duwa, 2014 | 2014 | 67 | 63 | 147.3 |
| S4 | Raji; Alade and Duwa, 2014 | 2014 | 67 | 70 | 151.8 |
| S4 | Raji; Alade and Duwa, 2014 | 2014 | 67 | 77 | 159.6 |
| S4 | Raji; Alade and Duwa, 2014 | 2014 | 67 | 84 | 162.1 |
| S5 | Wilson, Abbott and Abplanalp, 1961 | 1961 | 400 | 1 | 5.9 |
| S5 | Wilson, Abbott and Abplanalp, 1961 | 1961 | 400 | 7 | 37.9 |
| S5 | Wilson, Abbott and Abplanalp, 1961 | 1961 | 400 | 14 | 63.8 |
| S5 | Wilson, Abbott and Abplanalp, 1961 | 1961 | 400 | 21 | 84.0 |
| S5 | Wilson, Abbott and Abplanalp, 1961 | 1961 | 400 | 28 | 100.0 |
| S5 | Wilson, Abbott and Abplanalp, 1961 | 1961 | 400 | 35 | 111.2 |
| S6 | Karadavut; Taskin and Genc, 2017 | 2017 | 90 | 1 | 8.1 |
| S6 | Karadavut; Taskin and Genc, 2017 | 2017 | 90 | 7 | 29.6 |
| S6 | Karadavut; Taskin and Genc, 2017 | 2017 | 90 | 14 | 70.2 |
| S6 | Karadavut; Taskin and Genc, 2017 | 2017 | 90 | 21 | 108.5 |
| S6 | Karadavut; Taskin and Genc, 2017 | 2017 | 90 | 28 | 148.9 |
| S6 | Karadavut; Taskin and Genc, 2017 | 2017 | 90 | 35 | 177.5 |
| S6 | Karadavut; Taskin and Genc, 2017 | 2017 | 90 | 42 | 196.1 |
| S7 | Škrobánek *et al*., 2004 | 2004 | 68 | 1 | 7.5 |
| S7 | Škrobánek *et al*., 2004 | 2004 | 68 | 7 | 19.6 |
| S7 | Škrobánek *et al*., 2004 | 2004 | 68 | 14 | 42.9 |
| S7 | Škrobánek *et al*., 2004 | 2004 | 68 | 21 | 72.1 |
| S7 | Škrobánek *et al*., 2004 | 2004 | 68 | 28 | 98.8 |
| S7 | Škrobánek *et al*., 2004 | 2004 | 68 | 35 | 119.1 |
| S7 | Škrobánek *et al*., 2004 | 2004 | 68 | 42 | 142.8 |
| S7 | Škrobánek *et al*., 2004 | 2004 | 68 | 49 | 151.0 |
| S7 | Škrobánek *et al*., 2004 | 2004 | 68 | 56 | 158.6 |
| S8 | Raji; Alade and Duwa, 2014 | 2014 | 67 | 1 | 5.9 |
| S8 | Raji; Alade and Duwa, 2014 | 2014 | 67 | 7 | 15.7 |
| S8 | Raji; Alade and Duwa, 2014 | 2014 | 67 | 14 | 48.2 |
| S8 | Raji; Alade and Duwa, 2014 | 2014 | 67 | 21 | 73.3 |
| S8 | Raji; Alade and Duwa, 2014 | 2014 | 67 | 28 | 80.4 |
| S8 | Raji; Alade and Duwa, 2014 | 2014 | 67 | 35 | 92.0 |
| S8 | Raji; Alade and Duwa, 2014 | 2014 | 67 | 42 | 102.6 |
| S8 | Raji; Alade and Duwa, 2014 | 2014 | 67 | 49 | 117.8 |
| S8 | Raji; Alade and Duwa, 2014 | 2014 | 67 | 56 | 130.5 |
| S8 | Raji; Alade and Duwa, 2014 | 2014 | 67 | 63 | 136.2 |
| S8 | Raji; Alade and Duwa, 2014 | 2014 | 67 | 70 | 138.3 |
| S8 | Raji; Alade and Duwa, 2014 | 2014 | 67 | 84 | 146.1 |
| S8 | Raji; Alade and Duwa, 2014 | 2014 | 67 | 98 | 150.4 |
| S8 | Raji; Alade and Duwa, 2014 | 2014 | 67 | 112 | 144.5 |
| S8 | Raji; Alade and Duwa, 2014 | 2014 | 67 | 126 | 147.4 |
| S9 | Faraji-Arough *et al*., 2018 | 2018 | 83 | 1 | 8.5 |
| S9 | Faraji-Arough *et al*., 2018 | 2018 | 83 | 7 | 23.5 |
| S9 | Faraji-Arough *et al*., 2018 | 2018 | 83 | 14 | 51.4 |
| S9 | Faraji-Arough *et al*., 2018 | 2018 | 83 | 21 | 87.2 |
| S9 | Faraji-Arough *et al*., 2018 | 2018 | 83 | 28 | 137.3 |
| S9 | Faraji-Arough *et al*., 2018 | 2018 | 83 | 35 | 173.6 |
| S9 | Faraji-Arough *et al*., 2018 | 2018 | 83 | 42 | 207.8 |
| S10 | Faraji-Arough *et al*., 2018 | 2018 | 136 | 1 | 9.6 |
| S10 | Faraji-Arough *et al*., 2018 | 2018 | 136 | 7 | 22.1 |
| S10 | Faraji-Arough *et al*., 2018 | 2018 | 136 | 14 | 54.3 |
| S10 | Faraji-Arough *et al*., 2018 | 2018 | 136 | 21 | 93.9 |
| S10 | Faraji-Arough *et al*., 2018 | 2018 | 136 | 28 | 140.3 |
| S10 | Faraji-Arough *et al*., 2018 | 2018 | 136 | 35 | 181.1 |
| S10 | Faraji-Arough *et al*., 2018 | 2018 | 136 | 42 | 212.8 |
| S11 | Faraji-Arough *et al*., 2018 | 2018 | 41 | 1 | 9.0 |
| S11 | Faraji-Arough *et al*., 2018 | 2018 | 41 | 7 | 21.9 |
| S11 | Faraji-Arough *et al*., 2018 | 2018 | 41 | 14 | 53.5 |
| S11 | Faraji-Arough *et al*., 2018 | 2018 | 41 | 21 | 93.1 |
| S11 | Faraji-Arough *et al*., 2018 | 2018 | 41 | 28 | 142.0 |
| S11 | Faraji-Arough *et al*., 2018 | 2018 | 41 | 35 | 177.5 |
| S11 | Faraji-Arough *et al*., 2018 | 2018 | 41 | 42 | 197.0 |
| S12 | Faraji-Arough *et al*., 2018 | 2018 | 44 | 1 | 9.4 |
| S12 | Faraji-Arough *et al*., 2018 | 2018 | 44 | 7 | 20.0 |
| S12 | Faraji-Arough *et al*., 2018 | 2018 | 44 | 14 | 47.0 |
| S12 | Faraji-Arough *et al*., 2018 | 2018 | 44 | 21 | 85.9 |
| S12 | Faraji-Arough *et al*., 2018 | 2018 | 44 | 28 | 137.1 |
| S12 | Faraji-Arough *et al*., 2018 | 2018 | 44 | 35 | 178.5 |
| S12 | Faraji-Arough *et al*., 2018 | 2018 | 44 | 42 | 206.8 |
| S13 | Faraji-Arough *et al*., 2018 | 2018 | 31 | 1 | 8.5 |
| S13 | Faraji-Arough *et al*., 2018 | 2018 | 31 | 7 | 18.2 |
| S13 | Faraji-Arough *et al*., 2018 | 2018 | 31 | 14 | 39.0 |
| S13 | Faraji-Arough *et al*., 2018 | 2018 | 31 | 21 | 70.3 |
| S13 | Faraji-Arough *et al*., 2018 | 2018 | 31 | 28 | 111.5 |
| S13 | Faraji-Arough *et al*., 2018 | 2018 | 31 | 35 | 144.7 |
| S13 | Faraji-Arough *et al*., 2018 | 2018 | 31 | 42 | 174.2 |
| S14 | Faraji-Arough *et al*., 2018 | 2018 | 64 | 1 | 8.7 |
| S14 | Faraji-Arough *et al*., 2018 | 2018 | 64 | 7 | 20.2 |
| S14 | Faraji-Arough *et al*., 2018 | 2018 | 64 | 14 | 43.7 |
| S14 | Faraji-Arough *et al*., 2018 | 2018 | 64 | 21 | 75.7 |
| S14 | Faraji-Arough *et al*., 2018 | 2018 | 64 | 28 | 120.6 |
| S14 | Faraji-Arough *et al*., 2018 | 2018 | 64 | 35 | 157.7 |
| S14 | Faraji-Arough *et al*., 2018 | 2018 | 64 | 42 | 186.9 |
| S15 | Faraji-Arough *et al*., 2018 | 2018 | 71 | 1 | 8.8 |
| S15 | Faraji-Arough *et al*., 2018 | 2018 | 71 | 7 | 19.2 |
| S15 | Faraji-Arough *et al*., 2018 | 2018 | 71 | 14 | 43.3 |
| S15 | Faraji-Arough *et al*., 2018 | 2018 | 71 | 21 | 77.1 |
| S15 | Faraji-Arough *et al*., 2018 | 2018 | 71 | 28 | 122.7 |
| S15 | Faraji-Arough *et al*., 2018 | 2018 | 71 | 35 | 162.0 |
| S15 | Faraji-Arough *et al*., 2018 | 2018 | 71 | 42 | 186.8 |
| S16 | Balcıoğlu *et al*., 2005 | 2005 | 352 | 1 | 8.8 |
| S16 | Balcıoğlu *et al*., 2005 | 2005 | 352 | 7 | 28.3 |
| S16 | Balcıoğlu *et al*., 2005 | 2005 | 352 | 14 | 65.7 |
| S16 | Balcıoğlu *et al*., 2005 | 2005 | 352 | 21 | 115.6 |
| S16 | Balcıoğlu *et al*., 2005 | 2005 | 352 | 28 | 157.6 |
| S16 | Balcıoğlu *et al*., 2005 | 2005 | 352 | 35 | 203.9 |
| S16 | Balcıoğlu *et al*., 2005 | 2005 | 352 | 42 | 238.3 |
| S16 | Balcıoğlu *et al*., 2005 | 2005 | 352 | 49 | 257.8 |
| S16 | Balcıoğlu *et al*., 2005 | 2005 | 352 | 56 | 265.2 |
| S17 | Balcıoğlu *et al*., 2005 | 2005 | 272 | 1 | 7.6 |
| S17 | Balcıoğlu *et al*., 2005 | 2005 | 272 | 7 | 21.0 |
| S17 | Balcıoğlu *et al*., 2005 | 2005 | 272 | 14 | 43.4 |
| S17 | Balcıoğlu *et al*., 2005 | 2005 | 272 | 21 | 78.6 |
| S17 | Balcıoğlu *et al*., 2005 | 2005 | 272 | 28 | 113.2 |
| S17 | Balcıoğlu *et al*., 2005 | 2005 | 272 | 35 | 143.7 |
| S17 | Balcıoğlu *et al*., 2005 | 2005 | 272 | 42 | 167.1 |
| S17 | Balcıoğlu *et al*., 2005 | 2005 | 272 | 49 | 185.0 |
| S17 | Balcıoğlu *et al*., 2005 | 2005 | 272 | 56 | 187.5 |
| S18 | Balcıoğlu *et al*., 2005 | 2005 | 619 | 1 | 8.1 |
| S18 | Balcıoğlu *et al*., 2005 | 2005 | 619 | 7 | 24.8 |
| S18 | Balcıoğlu *et al*., 2005 | 2005 | 619 | 14 | 49.2 |
| S18 | Balcıoğlu *et al*., 2005 | 2005 | 619 | 21 | 82.8 |
| S18 | Balcıoğlu *et al*., 2005 | 2005 | 619 | 28 | 121.8 |
| S18 | Balcıoğlu *et al*., 2005 | 2005 | 619 | 35 | 153.3 |
| S18 | Balcıoğlu *et al*., 2005 | 2005 | 619 | 42 | 187.9 |
| S18 | Balcıoğlu *et al*., 2005 | 2005 | 619 | 49 | 204.4 |
| S18 | Balcıoğlu *et al*., 2005 | 2005 | 619 | 56 | 199.6 |
| S19 | Daida and Rani, 2017 | 2017 | 1200 | 1 | 8.1 |
| S19 | Daida and Rani, 2017 | 2017 | 1200 | 7 | 26.8 |
| S19 | Daida and Rani, 2017 | 2017 | 1200 | 14 | 48.2 |
| S19 | Daida and Rani, 2017 | 2017 | 1200 | 21 | 98.8 |
| S19 | Daida and Rani, 2017 | 2017 | 1200 | 28 | 139.7 |
| S19 | Daida and Rani, 2017 | 2017 | 1200 | 35 | 174.0 |
| S19 | Daida and Rani, 2017 | 2017 | 1200 | 42 | 211.7 |
| S20 | Daida and Rani, 2017 | 2017 | 1200 | 1 | 7.9 |
| S20 | Daida and Rani, 2017 | 2017 | 1200 | 7 | 28.1 |
| S20 | Daida and Rani, 2017 | 2017 | 1200 | 14 | 49.8 |
| S20 | Daida and Rani, 2017 | 2017 | 1200 | 21 | 96.7 |
| S20 | Daida and Rani, 2017 | 2017 | 1200 | 28 | 141.6 |
| S20 | Daida and Rani, 2017 | 2017 | 1200 | 35 | 175.9 |
| S20 | Daida and Rani, 2017 | 2017 | 1200 | 42 | 213.0 |
| S21 | Daida and Rani, 2017 | 2017 | 1200 | 1 | 8.0 |
| S21 | Daida and Rani, 2017 | 2017 | 1200 | 7 | 27.4 |
| S21 | Daida and Rani, 2017 | 2017 | 1200 | 14 | 69.8 |
| S21 | Daida and Rani, 2017 | 2017 | 1200 | 21 | 113.3 |
| S21 | Daida and Rani, 2017 | 2017 | 1200 | 28 | 140.7 |
| S21 | Daida and Rani, 2017 | 2017 | 1200 | 35 | 175.4 |
| S21 | Daida and Rani, 2017 | 2017 | 1200 | 42 | 214.1 |
| S22 | Almeida *et al*., 2002 | 2002 | 144 | 1 | 6.0 |
| S22 | Almeida *et al*., 2002 | 2002 | 144 | 7 | 21.4 |
| S22 | Almeida *et al*., 2002 | 2002 | 144 | 14 | 43.8 |
| S22 | Almeida *et al*., 2002 | 2002 | 144 | 21 | 66.0 |
| S22 | Almeida *et al*., 2002 | 2002 | 144 | 28 | 87.4 |
| S22 | Almeida *et al*., 2002 | 2002 | 144 | 35 | 101.4 |
| S22 | Almeida *et al*., 2002 | 2002 | 144 | 42 | 101.4 |
| S22 | Almeida *et al*., 2002 | 2002 | 144 | 49 | 103.1 |
| S23 | Inci *et al*., 2016 | 2016 | 30 | 7 | 32.2 |
| S23 | Inci *et al*., 2016 | 2016 | 30 | 14 | 44.0 |
| S23 | Inci *et al*., 2016 | 2016 | 30 | 21 | 94.8 |
| S23 | Inci *et al*., 2016 | 2016 | 30 | 28 | 138.2 |
| S23 | Inci *et al*., 2016 | 2016 | 30 | 35 | 170.1 |
| S23 | Inci *et al*., 2016 | 2016 | 30 | 42 | 195.5 |
| S23 | Inci *et al*., 2016 | 2016 | 30 | 49 | 212.1 |
| S24 | Inci *et al*., 2015 | 2015 | 90 | 1 | 8.2 |
| S24 | Inci *et al*., 2015 | 2015 | 90 | 14 | 61.8 |
| S24 | Inci *et al*., 2015 | 2015 | 90 | 21 | 112.2 |
| S24 | Inci *et al*., 2015 | 2015 | 90 | 28 | 151.9 |
| S24 | Inci *et al*., 2015 | 2015 | 90 | 35 | 187.5 |
| S24 | Inci *et al*., 2015 | 2015 | 90 | 42 | 209.8 |
| S25 | Inci *et al*., 2015 | 2015 | 90 | 1 | 7.9 |
| S25 | Inci *et al*., 2015 | 2015 | 90 | 14 | 56.3 |
| S25 | Inci *et al*., 2015 | 2015 | 90 | 21 | 102.7 |
| S25 | Inci *et al*., 2015 | 2015 | 90 | 28 | 146.5 |
| S25 | Inci *et al*., 2015 | 2015 | 90 | 35 | 185.1 |
| S25 | Inci *et al*., 2015 | 2015 | 90 | 42 | 212.0 |
| S26 | Inci *et al*., 2015 | 2015 | 90 | 1 | 8.0 |
| S26 | Inci *et al*., 2015 | 2015 | 90 | 14 | 59.8 |
| S26 | Inci *et al*., 2015 | 2015 | 90 | 21 | 102.5 |
| S26 | Inci *et al*., 2015 | 2015 | 90 | 28 | 144.0 |
| S26 | Inci *et al*., 2015 | 2015 | 90 | 35 | 181.7 |
| S26 | Inci *et al*., 2015 | 2015 | 90 | 42 | 212.2 |
| S27 | Inci *et al*., 2015 | 2015 | 90 | 1 | 8.3 |
| S27 | Inci *et al*., 2015 | 2015 | 90 | 14 | 65.2 |
| S27 | Inci *et al*., 2015 | 2015 | 90 | 21 | 116.5 |
| S27 | Inci *et al*., 2015 | 2015 | 90 | 28 | 155.8 |
| S27 | Inci *et al*., 2015 | 2015 | 90 | 35 | 197.6 |
| S27 | Inci *et al*., 2015 | 2015 | 90 | 42 | 218.6 |
| S28 | Ionita *et al*l., 2014 | 2014 | 300 | 1 | 8.4 |
| S28 | Ionita *et al*., 2014 | 2014 | 300 | 7 | 30.9 |
| S28 | Ionita *et al*., 2014 | 2014 | 300 | 14 | 54.8 |
| S28 | Ionita *et al*., 2014 | 2014 | 300 | 21 | 110.7 |
| S28 | Ionita *et al*., 2014 | 2014 | 300 | 28 | 147.8 |
| S28 | Ionita *et al*., 2014 | 2014 | 300 | 35 | 175.8 |
| S28 | Ionita *et al*., 2014 | 2014 | 300 | 42 | 200.5 |
| S29 | Parvin *et al*., 2009 | 2009 | 20 | 1 | 7.9 |
| S29 | Parvin *et al*., 2009 | 2009 | 20 | 7 | 26.9 |
| S29 | Parvin *et al*., 2009 | 2009 | 20 | 14 | 51.5 |
| S29 | Parvin *et al*., 2009 | 2009 | 20 | 21 | 91.9 |
| S29 | Parvin *et al*., 2009 | 2009 | 20 | 28 | 133.4 |
| S29 | Parvin *et al*., 2009 | 2009 | 20 | 35 | 159.3 |
| S30 | Djouvinov and Mihailov, 2005 | 2005 | 100 | 1 | 8.3 |
| S30 | Djouvinov and Mihailov, 2005 | 2005 | 100 | 7 | 31.3 |
| S30 | Djouvinov and Mihailov, 2005 | 2005 | 100 | 14 | 63.1 |
| S30 | Djouvinov and Mihailov, 2005 | 2005 | 100 | 21 | 97.0 |
| S30 | Djouvinov and Mihailov, 2005 | 2005 | 100 | 28 | 123.8 |
| S30 | Djouvinov and Mihailov, 2005 | 2005 | 100 | 35 | 144.8 |
| S30 | Djouvinov and Mihailov, 2005 | 2005 | 100 | 42 | 154.8 |
| S31 | Djouvinov and Mihailov, 2005 | 2005 | 100 | 1 | 8.7 |
| S31 | Djouvinov and Mihailov, 2005 | 2005 | 100 | 7 | 30.1 |
| S31 | Djouvinov and Mihailov, 2005 | 2005 | 100 | 14 | 61.3 |
| S31 | Djouvinov and Mihailov, 2005 | 2005 | 100 | 21 | 98.3 |
| S31 | Djouvinov and Mihailov, 2005 | 2005 | 100 | 28 | 127.7 |
| S31 | Djouvinov and Mihailov, 2005 | 2005 | 100 | 35 | 144.5 |
| S31 | Djouvinov and Mihailov, 2005 | 2005 | 100 | 42 | 156.1 |
| S32 | Bagh *et al*., 2016 | 2016 | 500 | 1 | 7.5 |
| S32 | Bagh *et al*., 2016 | 2016 | 500 | 7 | 18.4 |
| S32 | Bagh *et al*., 2016 | 2016 | 500 | 14 | 48.9 |
| S32 | Bagh *et al*., 2016 | 2016 | 500 | 21 | 92.3 |
| S32 | Bagh *et al*., 2016 | 2016 | 500 | 28 | 120.4 |
| S32 | Bagh *et al*., 2016 | 2016 | 500 | 35 | 152.8 |
| S32 | Bagh *et al*., 2016 | 2016 | 500 | 42 | 173.8 |
| S33 | Bagh *et al*., 2016 | 2016 | 500 | 1 | 7.4 |
| S33 | Bagh *et al*., 2016 | 2016 | 500 | 7 | 20.3 |
| S33 | Bagh *et al*., 2016 | 2016 | 500 | 14 | 44.0 |
| S33 | Bagh *et al*., 2016 | 2016 | 500 | 21 | 84.4 |
| S33 | Bagh *et al*., 2016 | 2016 | 500 | 28 | 113.0 |
| S33 | Bagh *et al*., 2016 | 2016 | 500 | 35 | 146.2 |
| S33 | Bagh *et al*., 2016 | 2016 | 500 | 42 | 168.2 |
| S34 | Bagh *et al*., 2016 | 2016 | 500 | 1 | 7.1 |
| S34 | Bagh *et al*., 2016 | 2016 | 500 | 7 | 21.6 |
| S34 | Bagh *et al*., 2016 | 2016 | 500 | 14 | 48.0 |
| S34 | Bagh *et al*., 2016 | 2016 | 500 | 21 | 91.3 |
| S34 | Bagh *et al*., 2016 | 2016 | 500 | 28 | 134.5 |
| S34 | Bagh *et al*., 2016 | 2016 | 500 | 35 | 149.1 |
| S34 | Bagh *et al*., 2016 | 2016 | 500 | 42 | 172.6 |
| S35 | Vali, 2009 | 2009 | 250 | 1 | 7.9 |
| S35 | Vali, 2009 | 2009 | 250 | 7 | 21.6 |
| S35 | Vali, 2009 | 2009 | 250 | 14 | 51.3 |
| S35 | Vali, 2009 | 2009 | 250 | 21 | 79.4 |
| S35 | Vali, 2009 | 2009 | 250 | 28 | 115.5 |
| S35 | Vali, 2009 | 2009 | 250 | 35 | 139.3 |
| S35 | Vali, 2009 | 2009 | 250 | 42 | 170.3 |
| S36 | Sarica; Corduk and Kilinc, 2005 | 2005 | 42 | 1 | 7.8 |
| S36 | Sarica; Corduk and Kilinc, 2005 | 2005 | 42 | 7 | 33.3 |
| S36 | Sarica; Corduk and Kilinc, 2005 | 2005 | 42 | 14 | 73.7 |
| S36 | Sarica; Corduk and Kilinc, 2005 | 2005 | 42 | 21 | 115.2 |
| S36 | Sarica; Corduk and Kilinc, 2005 | 2005 | 42 | 28 | 158.8 |
| S36 | Sarica; Corduk and Kilinc, 2005 | 2005 | 42 | 35 | 186.8 |
| S37 | Ali *et al*., 2018 | 2018 | 23 | 1 | 6.1 |
| S37 | Ali *et al*., 2018 | 2018 | 23 | 7 | 17.9 |
| S37 | Ali *et al*., 2018 | 2018 | 23 | 14 | 31.7 |
| S37 | Ali *et al*., 2018 | 2018 | 23 | 21 | 52.5 |
| S37 | Ali *et al*., 2018 | 2018 | 23 | 28 | 73.7 |
| S37 | Ali *et al*., 2018 | 2018 | 23 | 35 | 100.8 |
| S37 | Ali *et al*., 2018 | 2018 | 23 | 42 | 118.5 |
| S38 | Ali *et al*., 2018 | 2018 | 23 | 1 | 6.3 |
| S38 | Ali *et al*., 2018 | 2018 | 23 | 7 | 18.2 |
| S38 | Ali *et al*., 2018 | 2018 | 23 | 14 | 37.1 |
| S38 | Ali *et al*., 2018 | 2018 | 23 | 21 | 55.6 |
| S38 | Ali *et al*., 2018 | 2018 | 23 | 28 | 81.6 |
| S38 | Ali *et al*., 2018 | 2018 | 23 | 35 | 109.5 |
| S38 | Ali *et al*., 2018 | 2018 | 23 | 42 | 124.0 |
| S39 | Ali *et al*., 2018 | 2018 | 23 | 1 | 5.6 |
| S39 | Ali *et al*., 2018 | 2018 | 23 | 7 | 20.9 |
| S39 | Ali *et al*., 2018 | 2018 | 23 | 14 | 34.9 |
| S39 | Ali *et al*., 2018 | 2018 | 23 | 21 | 54.7 |
| S39 | Ali *et al*., 2018 | 2018 | 23 | 28 | 76.1 |
| S39 | Ali *et al*., 2018 | 2018 | 23 | 35 | 107.4 |
| S39 | Ali *et al*., 2018 | 2018 | 23 | 42 | 123.3 |
| S40 | Ali *et al*., 2018 | 2018 | 23 | 1 | 5.9 |
| S40 | Ali *et al*., 2018 | 2018 | 23 | 7 | 19.0 |
| S40 | Ali *et al*., 2018 | 2018 | 23 | 14 | 38.4 |
| S40 | Ali *et al*., 2018 | 2018 | 23 | 21 | 59.0 |
| S40 | Ali *et al*., 2018 | 2018 | 23 | 28 | 78.9 |
| S40 | Ali *et al*., 2018 | 2018 | 23 | 35 | 107.3 |
| S40 | Ali *et al*., 2018 | 2018 | 23 | 42 | 122.8 |
| S41 | Ali *et al*., 2018 | 2018 | 23 | 1 | 6.4 |
| S41 | Ali *et al*., 2018 | 2018 | 23 | 7 | 23.1 |
| S41 | Ali *et al*., 2018 | 2018 | 23 | 14 | 38.7 |
| S41 | Ali *et al*., 2018 | 2018 | 23 | 21 | 57.4 |
| S41 | Ali *et al*., 2018 | 2018 | 23 | 28 | 81.5 |
| S41 | Ali *et al*., 2018 | 2018 | 23 | 35 | 112.8 |
| S41 | Ali *et al*., 2018 | 2018 | 23 | 42 | 133.8 |
| S42 | Ali *et al*., 2018 | 2018 | 23 | 1 | 5.2 |
| S42 | Ali *et al*., 2018 | 2018 | 23 | 7 | 20.3 |
| S42 | Ali *et al*., 2018 | 2018 | 23 | 14 | 33.6 |
| S42 | Ali *et al*., 2018 | 2018 | 23 | 21 | 50.4 |
| S42 | Ali *et al*., 2018 | 2018 | 23 | 28 | 70.9 |
| S42 | Ali *et al*., 2018 | 2018 | 23 | 35 | 102.7 |
| S42 | Ali *et al*., 2018 | 2018 | 23 | 42 | 118.8 |
| S43 | Aljumaily and Taha, 2019 | 2019 | 150 | 1 | 7.2 |
| S43 | Aljumaily and Taha, 2019 | 2019 | 150 | 7 | 29.6 |
| S43 | Aljumaily and Taha, 2019 | 2019 | 150 | 14 | 59.4 |
| S43 | Aljumaily and Taha, 2019 | 2019 | 150 | 21 | 91.5 |
| S43 | Aljumaily and Taha, 2019 | 2019 | 150 | 28 | 124.7 |
| S43 | Aljumaily and Taha, 2019 | 2019 | 150 | 35 | 158.6 |
| S44 | Aljumaily and Taha, 2019 | 2019 | 150 | 1 | 7.2 |
| S44 | Aljumaily and Taha, 2019 | 2019 | 150 | 7 | 30.3 |
| S44 | Aljumaily and Taha, 2019 | 2019 | 150 | 14 | 59.0 |
| S44 | Aljumaily and Taha, 2019 | 2019 | 150 | 21 | 92.0 |
| S44 | Aljumaily and Taha, 2019 | 2019 | 150 | 28 | 125.5 |
| S44 | Aljumaily and Taha, 2019 | 2019 | 150 | 35 | 155.5 |
| S45 | Aljumaily and Taha, 2019 | 2019 | 150 | 1 | 7.3 |
| S45 | Aljumaily and Taha, 2019 | 2019 | 150 | 7 | 31.6 |
| S45 | Aljumaily and Taha, 2019 | 2019 | 150 | 14 | 59.9 |
| S45 | Aljumaily and Taha, 2019 | 2019 | 150 | 21 | 93.1 |
| S45 | Aljumaily and Taha, 2019 | 2019 | 150 | 28 | 126.5 |
| S45 | Aljumaily and Taha, 2019 | 2019 | 150 | 35 | 173.0 |
| S46 | Flauzina, 2007 | 2007 | 65 | 1 | 7.9 |
| S46 | Flauzina, 2007 | 2007 | 65 | 7 | 23.8 |
| S46 | Flauzina, 2007 | 2007 | 65 | 14 | 50.8 |
| S46 | Flauzina, 2007 | 2007 | 65 | 21 | 81.1 |
| S46 | Flauzina, 2007 | 2007 | 65 | 28 | 108.0 |
| S46 | Flauzina, 2007 | 2007 | 65 | 35 | 137.1 |
| S46 | Flauzina, 2007 | 2007 | 65 | 42 | 151.3 |
| S47 | Flauzina, 2007 | 2007 | 65 | 1 | 8.1 |
| S47 | Flauzina, 2007 | 2007 | 65 | 7 | 25.3 |
| S47 | Flauzina, 2007 | 2007 | 65 | 14 | 53.2 |
| S47 | Flauzina, 2007 | 2007 | 65 | 21 | 86.1 |
| S47 | Flauzina, 2007 | 2007 | 65 | 28 | 111.9 |
| S47 | Flauzina, 2007 | 2007 | 65 | 35 | 138.9 |
| S47 | Flauzina, 2007 | 2007 | 65 | 42 | 156.5 |
| S48 | Flauzina, 2007 | 2007 | 65 | 1 | 7.8 |
| S48 | Flauzina, 2007 | 2007 | 65 | 7 | 24.1 |
| S48 | Flauzina, 2007 | 2007 | 65 | 14 | 52.4 |
| S48 | Flauzina, 2007 | 2007 | 65 | 21 | 86.5 |
| S48 | Flauzina, 2007 | 2007 | 65 | 28 | 112.6 |
| S48 | Flauzina, 2007 | 2007 | 65 | 35 | 139.4 |
| S48 | Flauzina, 2007 | 2007 | 65 | 42 | 156.3 |
| S49 | Flauzina, 2007 | 2007 | 65 | 1 | 7.8 |
| S49 | Flauzina, 2007 | 2007 | 65 | 7 | 24.3 |
| S49 | Flauzina, 2007 | 2007 | 65 | 14 | 54.8 |
| S49 | Flauzina, 2007 | 2007 | 65 | 21 | 84.7 |
| S49 | Flauzina, 2007 | 2007 | 65 | 28 | 111.6 |
| S49 | Flauzina, 2007 | 2007 | 65 | 35 | 140.5 |
| S49 | Flauzina, 2007 | 2007 | 65 | 42 | 154.7 |
| S501 | Not published | 2019 | 70 | 1 | 8.0 |
| S501 | Not published | 2019 | 70 | 6 | 21.9 |
| S501 | Not published | 2019 | 70 | 11 | 37.4 |
| S501 | Not published | 2019 | 70 | 17 | 55.4 |
| S501 | Not published | 2019 | 70 | 22 | 70.6 |
| S501 | Not published | 2019 | 70 | 27 | 98.3 |
| S501 | Not published | 2019 | 70 | 32 | 110.2 |
| S501 | Not published | 2019 | 70 | 37 | 123.9 |
| S501 | Not published | 2019 | 70 | 42 | 137.5 |
| S501 | Not published | 2019 | 70 | 47 | 147.2 |
| S501 | Not published | 2019 | 70 | 52 | 146.2 |
| S501 | Not published | 2019 | 70 | 57 | 146.0 |
| S501 | Not published | 2019 | 70 | 60 | 144.4 |
| S511 | Not published | 2019 | 70 | 1 | 8.6 |
| S511 | Not published | 2019 | 70 | 6 | 22.7 |
| S511 | Not published | 2019 | 70 | 11 | 37.0 |
| S511 | Not published | 2019 | 70 | 17 | 55.2 |
| S511 | Not published | 2019 | 70 | 22 | 71.3 |
| S511 | Not published | 2019 | 70 | 27 | 99.8 |
| S511 | Not published | 2019 | 70 | 32 | 115.3 |
| S511 | Not published | 2019 | 70 | 37 | 127.4 |
| S511 | Not published | 2019 | 70 | 42 | 143.9 |
| S511 | Not published | 2019 | 70 | 47 | 153.5 |
| S511 | Not published | 2019 | 70 | 52 | 152.2 |
| S511 | Not published | 2019 | 70 | 57 | 151.5 |
| S511 | Not published | 2019 | 70 | 60 | 153.1 |
| S521 | Not published | 2019 | 70 | 1 | 8.0 |
| S521 | Not published | 2019 | 70 | 6 | 19.9 |
| S521 | Not published | 2019 | 70 | 11 | 35.2 |
| S521 | Not published | 2019 | 70 | 17 | 53.8 |
| S521 | Not published | 2019 | 70 | 22 | 71.2 |
| S521 | Not published | 2019 | 70 | 27 | 96.2 |
| S521 | Not published | 2019 | 70 | 32 | 114.3 |
| S521 | Not published | 2019 | 70 | 37 | 127.0 |
| S521 | Not published | 2019 | 70 | 42 | 141.4 |
| S521 | Not published | 2019 | 70 | 47 | 156.8 |
| S521 | Not published | 2019 | 70 | 52 | 154.9 |
| S521 | Not published | 2019 | 70 | 57 | 157.2 |
| S521 | Not published | 2019 | 70 | 60 | 158.8 |

1 Studies not published.

**References**

Ali MM, Alam J, Islam S, Rahman A, Ahmed S and Zaman H 2018. Comparative study on growth of different mutants Japanese quail in Bangladesh. Asian-Australasian Journal of Bioscience and Biotechnology 3, 7-10.

Aljumaily TKH and Taha AT 2019. Effects of spirulina platensis algae extract early feeding on Japanese quail embryos. Advances in Animal and Veterinary Sciences 7, 30-37.

Almeida MIM, Oliveira EG, Ramos PR, Veiga N and Dias K 2002. Growth performance of meat male quais (coturnix sp.) of two lines under two nutritional environments. Archives of Veterinary Science 7, 103-108.

Bagh J, Panigrahi B, Panda N, Pradhan CR, Mallik BK, Majhi B and Rout SS 2016. Body weight, egg production, and egg quality traits of gray, brown, and white varieties of Japanese quail (*Coturnix coturnix japonica*) in coastal. Veterinary World 9, 832-836. Balcioǧlu MS, Kizilkaya K, Yolcu HI and Karabaǧ K 2005. Analysis of growth characteristics in short-term divergently selected Japanese quail. South African Journal of Animal Science 35, 83-89.

Daida K and Rani MS 2017. Selective breeding of Japanese quails for improvement of performance. International Journal of Current Microbiology and Applied Sciences 6, 2500-2506.

Djouvinov D and Mihailov R 2005. Effect of low protein level on performance of growing and laying Japanese quails (*Coturnix coturnix japonica*). Bulgarian Journal of Veterinary Medicine 8, 91-93.

Faraji-Arough H, Rokouel M, Maghsoudi A and Ghazaghi M 2018. Comparative study of growth patterns in seven strains of Japanese quail using nonlinear. Turkish Journal of Veterinary and Animal Sciences 42, 441-451.

Flauzina LP 2007. Desempenho produtivo e biometria de vísceras de codornas japonesas alimentadas com dietas contend diferentes níveis de proteína bruta. Mater’s thesis, University of Brasília, Brasília, Distrito Federal, Brazil.

Grieser DO, Marcato SM, Furlan AC, Zancanela V, Vesco APD, Batista E, Pasquetti TJ and Euzébio TC 2012. Estudo do crescimento e composição corporal de linhagens de codornas de corte e postura. Mater’s thesis, State University Maringá Agricultural Science Center, Maringa, Paraná, Brazil.

Inci H, Sogut B, Sengul T, Sengul AY and Taysi MR 2015. Comparison of fattening performance, carcass characteristics, and egg quality characteristics of Japanese quails with different feather colors. Revista Brasileira de Zootecnia 44, 390-396.

Inci H, Ozdemir G, Sengul AY, Sogut B, Nursoy H and Sengul T 2016. Using juniper berry (*Juniperus communis*) as a supplement in Japanese quail diets. Revista Brasileira de Zootecnia 45, 230-235.

Ionita L, Popescu-Miclosanu E, Custurӑ I, Roibu C and Tudorache M 2014. Study on evolution of production parameters to the quail youth of balotesti population between 0-6 weeks of growth by daily light duration. Scientific Papers Series D. Animal Science 57, 200-203.

Karadavut U, Taskin A and Genc S 2017. Comparison of growth curve models in Japanese quail raised in cages enriched with different colored lights. Revista Brasileira de Zootecnia 46, 839-846.

Lobato GBV 2016. Curva de crescimento e taxa de deposição de componentes corporais em poedeiras leves, codornas japonesas e europeias. PhD thesis, Federal University of Paraíba, Areia, Pernambuco, Brazil.

Parvin R, Mandal AB, Singh SM and Thakur R 2009. Effect of dietary level of methionine on growth performance and immune response in Japanese quails (*Coturnix coturnix japonica*). Journal of the Science of Food and Agriculture 90, 471-481.

Raji AO, Alade NK and Duwa H 2014. Estimation of model parameters of the Japanese quail growth curve using gompertz model. Archivos de Zootecnia 63, 429-435.

Sarica S, Corduk M and Kilinc K 2005. The effect of dietary L-carnitine supplementation on growth performance, carcass traits, and composition of edible meat in Japanese quail (*Coturnix coturnix japonica*). The Journal of Applied Poultry Research 14, 709-715.

Škrobánek P, Hrbatá M, Baranovská M and Juráni M 2004. Growth of Japanese quail chicks in simulated weightlessness. Acta Veterinaria Brno 73, 157-164.

Vali N 2009. Growth, feed consumption and carcass composition of *Coturnix japonica,* *Coturnix ypsilophorus* and their reciprocal crosses. Asian Journal of Poultry Science 3, 132-137.

Wilson WO, Abbott UK and Abplanalp H 1961. Evaluation of coturnix (Japanese quail) as pilot animal for poultry. Poultry Science Journal 11, 651-657.
